# Supplementary material
Source: publisher site journal article supplement (https://www.dovepress.com/article/575280)
Supplement: Supplementary file 1 [file 575280_Supplementary%20tables.docx]

**Supplementary** **File 1.** Demographic characteristics, vital sign measurements, and laboratory variables with the percentage of missing data.

|  | Northern Jiangsu People’s Hospital | Percentage of missing data, % | MIMIC-IV | Percentage of missing data, % |
| --- | --- | --- | --- | --- |
| **Demographic data** |  |  |  |  |
| Gender, n (%) | 274 | 0.000 | 550 | 0.000 |
| AGE(years) | 274 | 0.000 | 550 | 0.000 |
| **Vital signs** |  |  |  |  |
| Temperature (℃) | 274 | 0.000 | 550 | 0.000 |
| Heart rate (/min) | 274 | 0.000 | 549 | 0.001 |
| Respiratory rate (/min) | 274 | 0.000 | 550 | 0.000 |
| MAP(mmHg) | 274 | 0.000 | 543 | 0.013 |
| SOFA | 274 | 0.000 | 550 | 0.000 |
| Comorbidities, n (%) |  |  |  |  |
| Hypertension | 274 | 0.000 | 550 | 0.000 |
| Diabetes | 274 | 0.000 | 550 | 0.000 |
| COPD | 274 | 0.000 | 550 | 0.000 |
| Malignant tumor | 274 | 0.000 | 550 | 0.000 |
| Coronary atherosclerosis | 274 | 0.000 | 550 | 0.000 |
| Renal disease | 274 | 0.000 | 550 | 0.000 |
| STROKE | 274 | 0.000 | 550 | 0.000 |
| **Laboratory data** |  |  |  |  |
| Hemoglobin (g/L) | 274 | 0.000 | 546 | 0.007 |
| White blood cell (*109) | 274 | 0.000 | 546 | 0.007 |
| Platelet (*109) | 274 | 0.000 | 546 | 0.007 |
| Neutrophil (*109) | 274 | 0.000 | 384 | 0.302 |
| Lymphocyte (*109) | 274 | 0.000 | 384 | 0.302 |
| Albumin (g/dL) | 265 | 0.032 | 329 | 0.402 |
| Total bilirubin (mg/dL) | 265 | 0.032 | 470 | 0.145 |
| Alanine aminotransferase (U/L) | 265 | 0.032 | 473 | 0.140 |
| Aspartate aminotransferase (U/L) | 265 | 0.032 | 475 | 0.136 |
| Blood urea nitrogen(mmol/L) | 265 | 0.032 | 546 | 0.007 |
| Creatinine (mg/dL) | 265 | 0.032 | 546 | 0.007 |
| Potassium (mmol/L) | 271 | 0.015 | 546 | 0.007 |
| Sodium (mmol/L) | 271 | 0.015 | 546 | 0.007 |
| Calcium (mmol/L) | 271 | 0.015 | 541 | 0.016 |
| Prothrombin time (seconds) | 267 | 0.029 | 491 | 0.107 |
| Activated partial thromboplastin time (seconds) | 267 | 0.029 | 484 | 0.120 |
| International normalized ratio (seconds) | 267 | 0.029 | 491 | 0.107 |
| Arterial pH | 274 | 0.000 | 404 | 0.265 |
| Lactic acid (mmol/L) | 274 | 0.000 | 320 | 0.418 |
| **Intervention, n (%)** |  |  |  |  |
| Antivirus drug use | 274 | 0.000 | 550 | 0.000 |
| Glucocorticoid use | 274 | 0.000 | 550 | 0.000 |

**Supplementary File 2.** The baseline characteristics of the validation set.

|  | Non-Septic Shock(N=61) | Septic Shock(N=14) |
| --- | --- | --- |
| Gender, n (%) |  |  |
| Male | 44 (72.1%) | 11 (78.6%) |
| Female | 17 (27.9%) | 3 (21.4%) |
| AGE(years) | 55.5 [44.8;63.2] | 60.0 [47.0;72.0] |
|  |  |  |
| Vital signs |  |  |
| Temperature (℃) | 36.8 [36.6;37.2] | 37.1 [36.7;37.6] |
| Heart rate (/min) | 89.0 [71.0;100] | 98.0 [90.0;118] |
| Respiratory rate (/min) | 24.0 [19.0;27.0] | 24.5 [20.2;27.8] |
| MAP(mmHg) | 88.0 [81.2;104] | 83.0 [72.0;91.0] |
| SOFA | 6.00 [5.00;8.00] | 6.50 [5.00;9.00] |
|  |  |  |
| Comorbidities, n (%) |  |  |
| Hypertension | 17 (27.9%) | 7 (50.0%) |
| Diabetes | 27 (44.3%) | 5 (35.7%) |
| COPD | 10 (16.4%) | 5 (35.7%) |
| Malignant tumor | 6 (9.84%) | 0 (0.00%) |
| Coronary atherosclerosis | 1 (1.64%) | 0 (0.00%) |
| Renal disease | 15 (24.6%) | 1 (7.14%) |
| STROKE | 3 (4.92%) | 0 (0.00%) |
|  |  |  |
| Laboratory data |  |  |
| Hemoglobin (g/L) | 107 [89.0;135] | 118 [97.0;136] |
| White blood cell (*109) | 14.3 [9.80;18.5] | 10.9 [8.42;12.4] |
| Platelet (*109) | 188 [118;264] | 254 [195;307] |
| Neutrophil (*109) | 8.20 [4.20;10.1] | 6.90 [4.53;8.45] |
| Lymphocyte (*109) | 1.17 [0.67;1.54] | 0.90 [0.69;1.06] |
| Albumin (g/dL) | 28.0 [23.0;32.0] | 26.5 [23.5;30.2] |
| Total bilirubin (mg/dL) | 10.2 [6.80;15.3] | 11.9 [8.50;21.3] |
| Alanine aminotransferase (U/L) | 40.0 [27.0;75.0] | 42.0 [23.2;50.8] |
| Aspartate aminotransferase (U/L) | 68.0 [36.0;104] | 57.0 [38.2;76.0] |
| Blood urea nitrogen(mmol/L) | 11.1 [7.85;15.7] | 15.0 [8.75;22.6] |
| Creatinine (mg/dL) | 123 [88.0;185] | 136 [97.0;338] |
| Potassium (mmol/L) | 4.80 [4.20;5.40] | 4.75 [4.25;4.90] |
| Sodium (mmol/L) | 139 [137;142] | 138 [136;141] |
| Calcium (mmol/L) | 2.10 [1.98;2.18] | 2.14 [2.10;2.23] |
| Prothrombin time (seconds) | 14.1 [12.8;17.0] | 13.5 [12.6;14.9] |
| Activated partial thromboplastin time (seconds) | 35.6 [28.2;53.1] | 55.0 [32.8;82.3] |
| International normalized ratio (seconds) | 1.30 [1.20;1.60] | 1.25 [1.20;1.37] |
| Arterial pH | 7.29 [7.19;7.34] | 7.28 [7.19;7.34] |
| Lactic acid (mmol/L) | 1.35 [1.02;1.60] | 1.90 [1.40;2.80] |
|  |  |  |
| Intervention, n (%) |  |  |
| Antivirus drug use | 8 (13.1%) | 0 (0.00%) |
| Glucocorticoid use | 39 (63.9%) | 5 (35.7%) |
